# Supplementary material for: A Green Voltammetric Determination of Molnupiravir using a Disposable Screen-Printed Reduced Graphene Oxide Electrode: Application to Pharmaceutical Dosage Form and Biological Fluid
Source: Preprints.org preprint supplement (doi:10.20944/preprints202306.2194.v1), 2023-06-30
Supplement: Supplementary file 1 [file supplementary]

Supplementary Material

**A Green Voltammetric Determination of Molnupiravir using a Disposable Screen-Printed Reduced Graphene Oxide Electrode: Application to Pharmaceutical Dosage Form and Biological Fluid**

**Abdelrahman Nabil1, Hassan A.M. Hendawy2, Randa Abdel-Salam3, Rasha M. Ahmed1, Ahmed Shawky1, Samy Emara1*, Noha Ibrahim1.**

1Pharmaceutical Chemistry Department, Faculty of Pharmacy, Misr International University, Km 28 Ismailia Road, Cairo 44971, Egypt.

2Chemistry Department, Egyptian Drug Authority, Giza 12512, Egypt.

| **Citation:** To be added by editorial staff during production.  Academic Editor: First nameLast name  Received: date  Revised: date  Accepted: date  Published: date  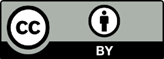  **Copyright:**© 2023 by the authors. Submitted for possible open access publication under the terms and conditions of the Creative Commons Attribution (CC BY) license (https://creativecommons.org/licenses/by/4.0/). |
| --- |

3 Analytical Chemistry Department, Faculty of Pharmacy, Suez Canal University Ismailia, 41522, Ismailia, Egypt.

***** Correspondence: [sami.omara@miuegypt.edu.eg](mailto:sami.omara@miuegypt.edu.eg); Tel.: +202-01004052675


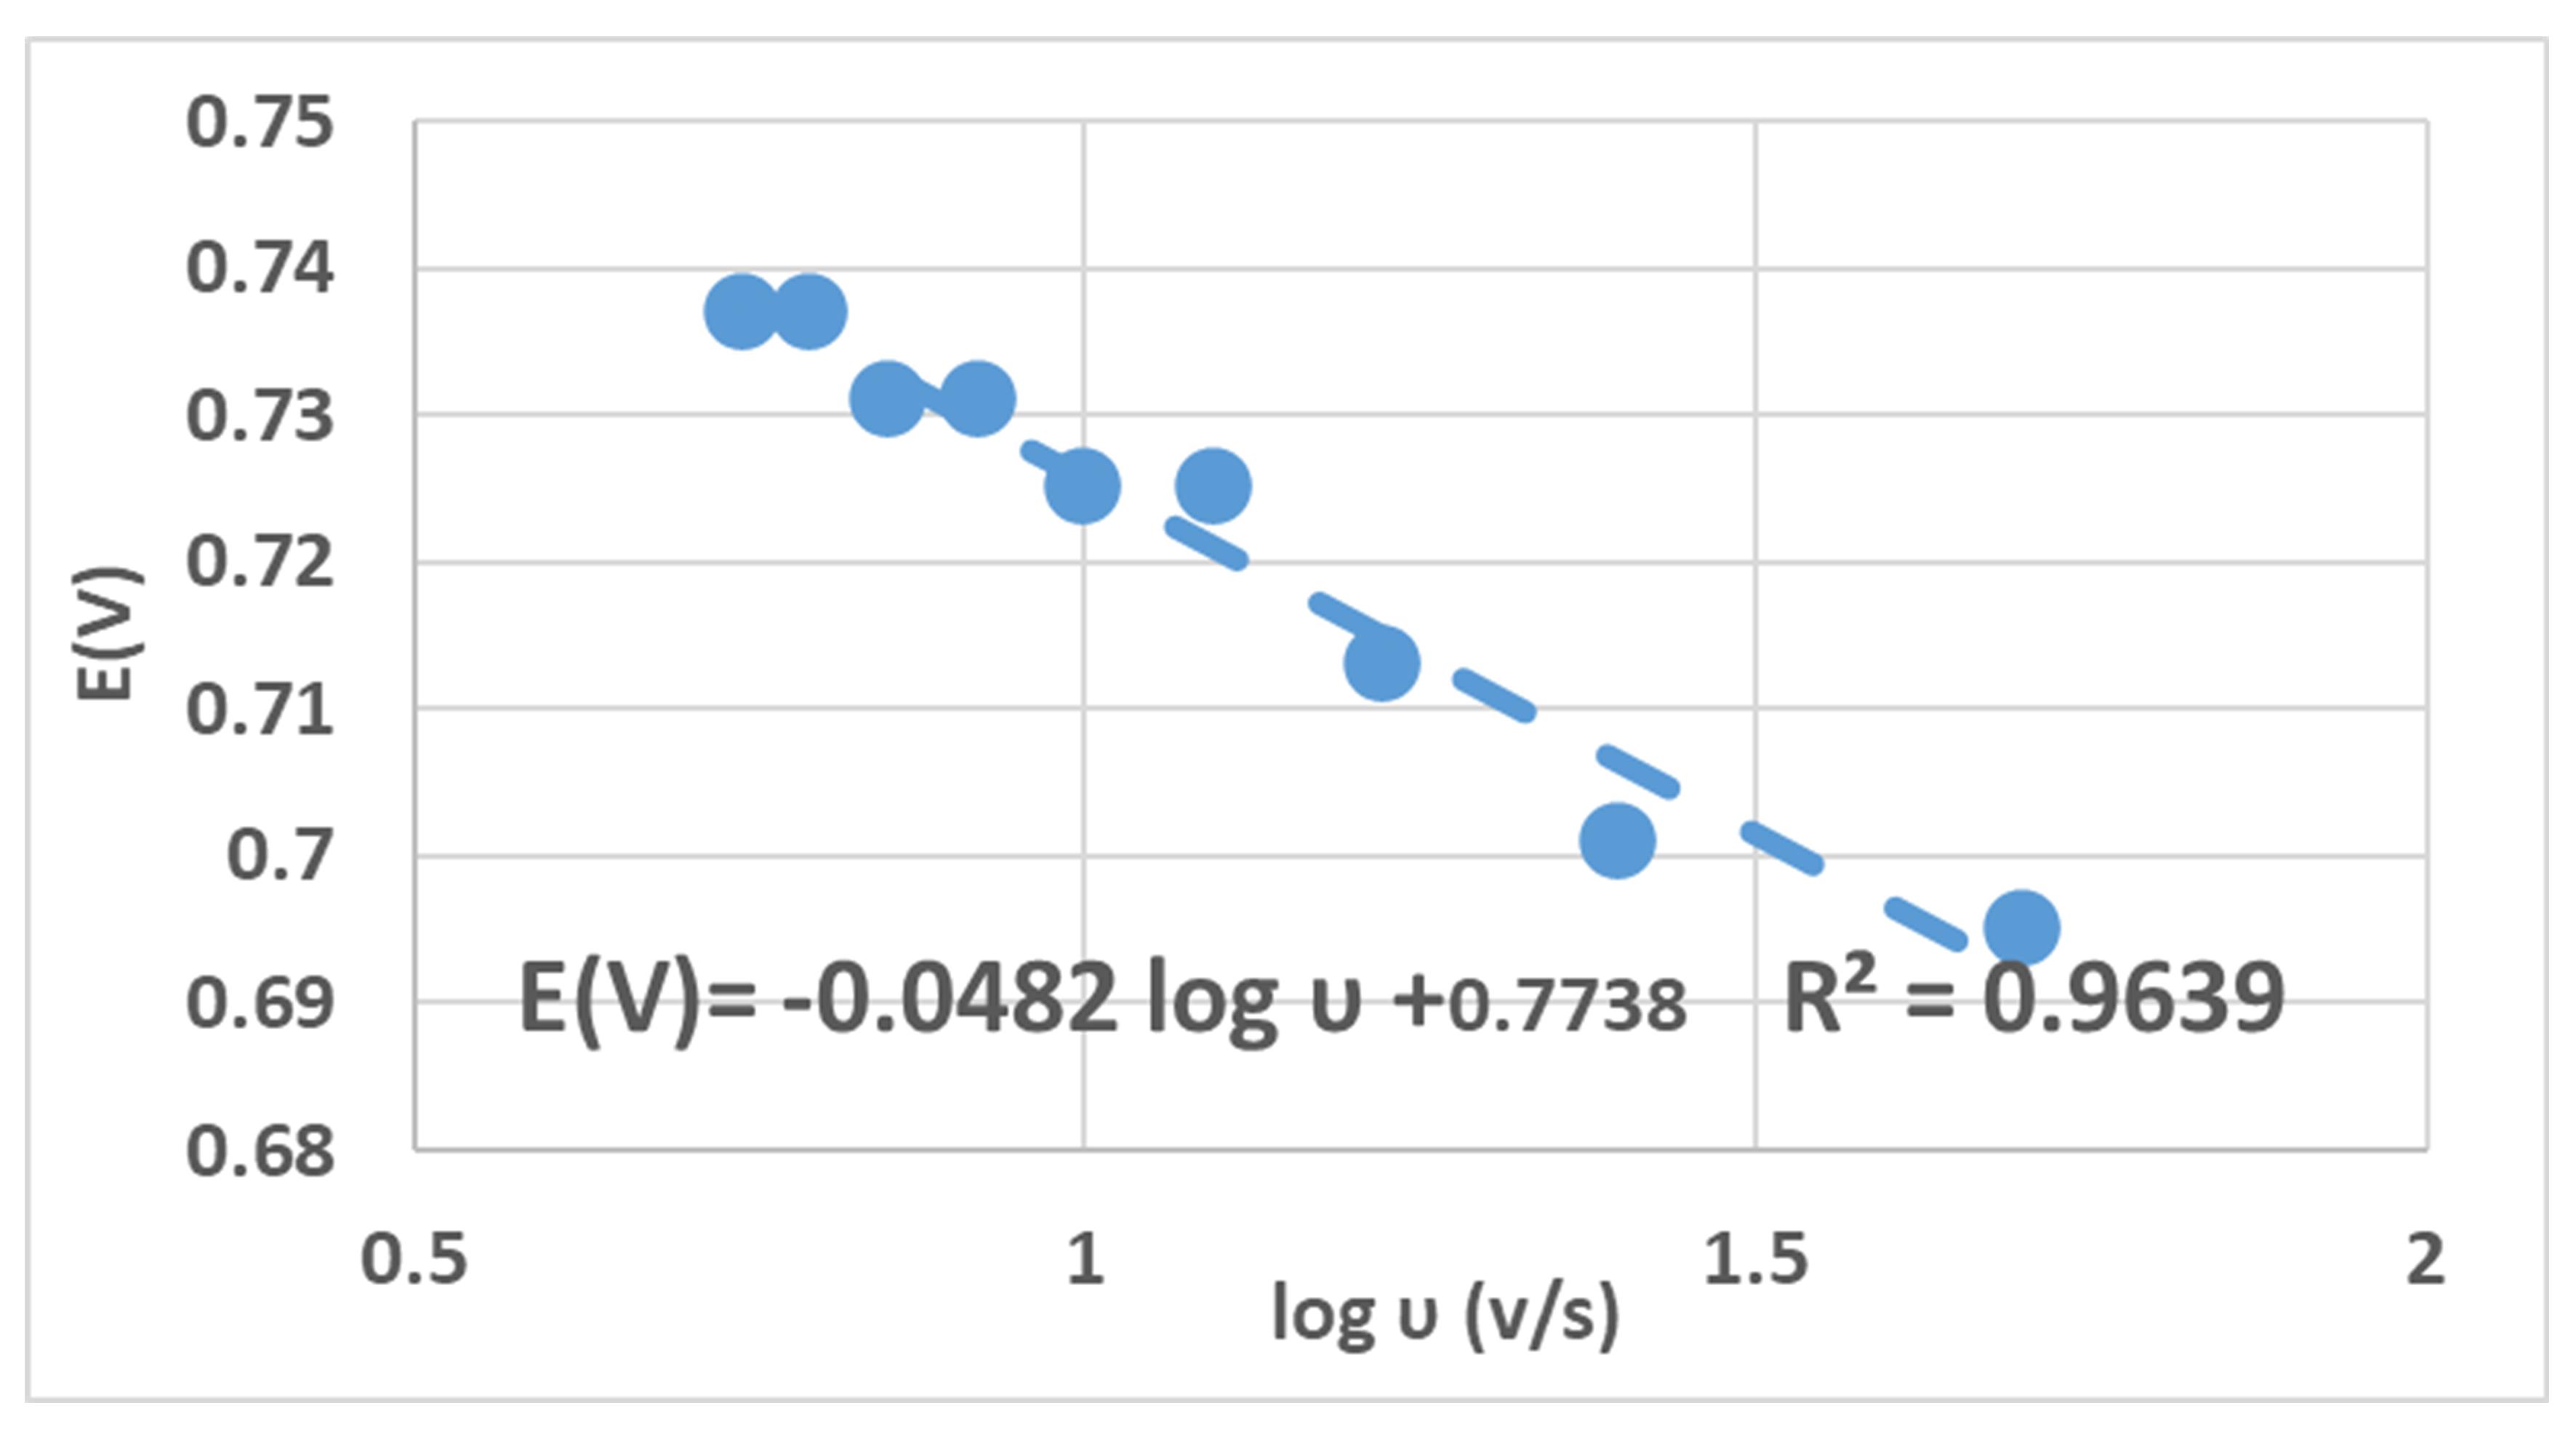


**Figure S1.** A linear relationship between the logarithm of the scan rate and the peak potential
